# Supplementary material
Source: MDPI journal article supplement (https://www.mdpi.com/2073-4441/14/22/3684)
Supplement: s1 [file s1]

## **Supplementary Material**

### **The Preparation of a Lignosulfonate/Chitosan–Graphene Oxide Hydrogel Biosorbent to Effectively Remove Cr(VI) from Wastewater: Adsorption Performance and Mechanisms**

**Caohui Han <sup>1,2</sup>, Xiaonan Liu <sup>1,2</sup>, Tingting Wang <sup>1,2</sup>, Xiaoyin Sun <sup>1,2</sup>, Lu Bai <sup>1,2</sup> and  
Yongchang Sun <sup>1,2,\*</sup>**

<sup>1</sup> School of Water and Environment, Chang'an University, Xi'an 710054, China;

<sup>2</sup> Key Laboratory of Subsurface Hydrology and Ecological Effect in Arid Region,  
Ministry of Education, Chang'an University, Xi'an 710054, China

\* Correspondence: ycsun@chd.edu.cn; Tel.: +86-29-82339952; Fax: +86-29-  
82339281

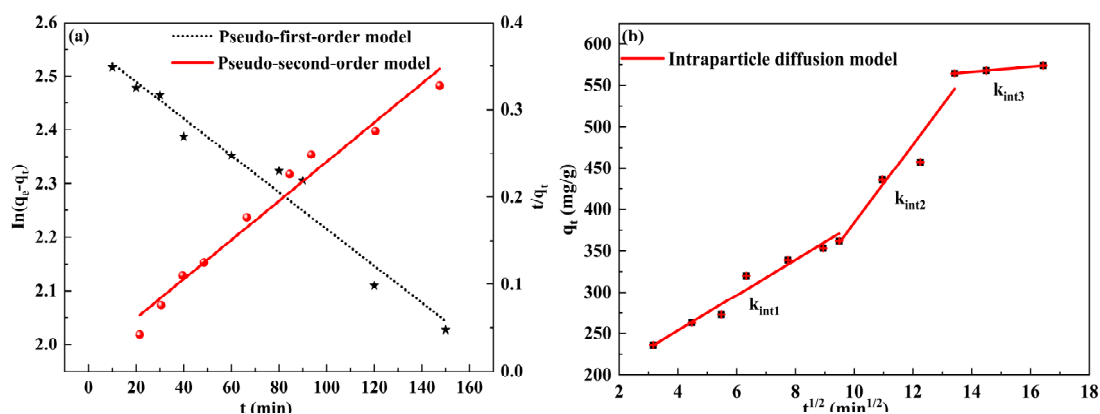

**Figure S1.** (a) pseudo-first-order model and pseudo-second-order kinetic model, (b) Intraparticle diffusion model.

**Table S1.** Langmuir and Freundlich isotherm models fitting parameters for Cr(VI) adsorption on LCGH at the range of temperature of 298 K–318 K.

| Isotherm model | Parameter                               | Temperature (K) |         |         |
|----------------|-----------------------------------------|-----------------|---------|---------|
|                |                                         | 298 K           | 308 K   | 318 K   |
| Langmuir       | $q_m$ (mg/g)                            | 621.12          | 806.45  | 1001.00 |
|                | $K_L$ (L/mg)                            | 0.1861          | 0.3435  | 1.2902  |
|                | $R^2$                                   | 0.9951          | 0.9899  | 0.9999  |
|                | $q_{exp}$ (mg/g)                        | 564.2           | 768.6   | 967.6   |
| Freundlich     | $K_F((\text{mg/g})(\text{L/mg})^{1/n})$ | 8.8410          | 11.2436 | 13.2249 |
|                | $1/n$                                   | 0.3342          | 0.2765  | 0.2741  |
|                | $R^2$                                   | 0.9743          | 0.9568  | 0.9236  |
|                |                                         |                 |         |         |

**Table S2.**  $R_L$  values based on the Langmuir equation.

| Temp. | $K_L$  | $R_L$ Concentration (mg/L) |         |         |         |         |         |
|-------|--------|----------------------------|---------|---------|---------|---------|---------|
|       |        | 5                          | 10      | 25      | 50      | 75      | 100     |
| 298 K | 0.1861 | 0.5180                     | 0.3495  | 0.1769  | 0.09704 | 0.06686 | 0.05099 |
| 308 K | 0.3435 | 0.3680                     | 0.2255  | 0.1043  | 0.05502 | 0.03737 | 0.02829 |
| 318 K | 1.2902 | 0.1342                     | 0.07193 | 0.03007 | 0.01526 | 0.01023 | 0.00769 |
